# Supplementary material for: Integrated microRNA, gene expression and transcription factors signature in papillary thyroid cancer with lymph node metastasis
Source: PeerJ. 2016 Jun 15;4:e2119. doi: 10.7717/peerj.2119 (PMC4918724; doi:10.7717/peerj.2119)
Supplement: Table S1 [file peerj-04-2119-s001.docx]

Supplementary Table 1: TCGA sample IDs of 477 papillary thyroid cancer patients with microRNA and gene expression data

| **Sample IDs** | **Sample IDs** | **Sample IDs** | **Sample IDs** | **Sample IDs** |
| --- | --- | --- | --- | --- |
| | TCGA-BJ-A0ZB | | --- | | TCGA-BJ-A0ZH | | TCGA-DE-A0Y3 | | TCGA-DE-A3KN | | TCGA-DE-A4MB | | TCGA-DE-A4MC | | TCGA-DE-A4MD | | TCGA-DJ-A1QD | | TCGA-DJ-A2Q1 | | TCGA-DJ-A2Q5 | | TCGA-DJ-A2Q6 | | TCGA-DJ-A2QB | | TCGA-DJ-A3UO | | TCGA-DJ-A3V0 | | TCGA-DJ-A3V8 | | TCGA-DJ-A3V9 | | TCGA-DJ-A3VF | | TCGA-DJ-A4UQ | | TCGA-DJ-A4UR | | TCGA-DJ-A4UW | | TCGA-DJ-A4V5 | | TCGA-DO-A1K0 | | TCGA-DO-A2HM | | TCGA-E3-A3E5 | | TCGA-E8-A415 | | TCGA-E8-A436 | | TCGA-EL-A3CM | | TCGA-EL-A3CO | | TCGA-EL-A3CR | | TCGA-EL-A3CV | | TCGA-EL-A3CY | | TCGA-EM-A1CT | | TCGA-EM-A2CK | | TCGA-EM-A2CS | | TCGA-EM-A2OX | | TCGA-EM-A2P0 | | TCGA-EM-A2P1 | | TCGA-EM-A3AN | | TCGA-EM-A3AO | | TCGA-EM-A3FJ | | TCGA-EM-A3FK | | TCGA-EM-A3FM | | TCGA-EM-A3FQ | | TCGA-EM-A3SU | | TCGA-EM-A4FM | | TCGA-EM-A4FN | | TCGA-EM-A22K | | TCGA-EM-A22P | | TCGA-ET-A3BT | | TCGA-ET-A25L | | TCGA-ET-A40Q | | TCGA-FE-A231 | | TCGA-FK-A3S3 | | TCGA-FK-A3SG | | TCGA-FY-A3R6 | | TCGA-FY-A40L | | TCGA-GE-A2C6 | | TCGA-H2-A2K9 | | TCGA-IM-A3U2 | | TCGA-IM-A4EB | | TCGA-J8-A3O1 | | TCGA-J8-A3O2 | | TCGA-J8-A3YH | | TCGA-J8-A4HY | | TCGA-KS-A4I5 | | TCGA-MK-A4N6 | | TCGA-BJ-A0Z5 | | TCGA-BJ-A0ZJ | | TCGA-BJ-A3PU | | TCGA-BJ-A4O8 | | TCGA-BJ-A28T | | TCGA-BJ-A28X | | TCGA-BJ-A28Z | | TCGA-BJ-A45J | | TCGA-BJ-A290 | | TCGA-DE-A0XZ | | TCGA-DE-A0Y2 | | TCGA-DE-A4MA | | TCGA-DJ-A1QH | | TCGA-DJ-A2PQ | | TCGA-DJ-A2PR | | TCGA-DJ-A2PS | | TCGA-DJ-A2PW | | TCGA-DJ-A2PY | | TCGA-DJ-A2Q3 | | TCGA-DJ-A2Q4 | | TCGA-DJ-A2Q7 | | TCGA-DJ-A2Q9 | | TCGA-DJ-A3UQ | | TCGA-DJ-A3UR | | TCGA-DJ-A3V2 | | TCGA-DJ-A3V4 | | TCGA-DJ-A3VA | | TCGA-DJ-A3VB | | TCGA-DJ-A3VD | | | TCGA-DJ-A3VJ | | --- | | TCGA-E3-A3DY | | TCGA-E3-A3E2 | | TCGA-E8-A2JQ | | TCGA-E8-A417 | | TCGA-EL-A3CU | | TCGA-EL-A3CZ | | TCGA-EL-A3GP | | TCGA-EL-A3TB | | TCGA-EM-A1CU | | TCGA-EM-A2CQ | | TCGA-EM-A2CU | | TCGA-EM-A3AJ | | TCGA-EM-A3AR | | TCGA-EM-A3FR | | TCGA-EM-A3O3 | | TCGA-EM-A3SX | | TCGA-EM-A22O | | TCGA-ET-A2MX | | TCGA-ET-A2N0 | | TCGA-ET-A3BO | | TCGA-ET-A3BP | | TCGA-ET-A3BS | | TCGA-ET-A3BU | | TCGA-ET-A3BV | | TCGA-ET-A3BX | | TCGA-ET-A3DR | | TCGA-ET-A3DT | | TCGA-ET-A3DU | | TCGA-ET-A25J | | TCGA-ET-A25K | | TCGA-ET-A25N | | TCGA-ET-A25O | | TCGA-ET-A39K | | TCGA-ET-A40R | | TCGA-ET-A40T | | TCGA-FE-A3PB | | TCGA-FE-A230 | | TCGA-FK-A3SB | | TCGA-FK-A3SE | | TCGA-FK-A3SH | | TCGA-FK-A4UB | | TCGA-FY-A3NN | | TCGA-FY-A3R7 | | TCGA-FY-A3YR | | TCGA-FY-A4B3 | | TCGA-H2-A421 | | TCGA-IM-A3EB | | TCGA-IM-A41Y | | TCGA-IM-A420 | | TCGA-J8-A3NZ | | TCGA-J8-A3YD | | TCGA-J8-A3YG | | TCGA-J8-A42S | | TCGA-KS-A4IC | | TCGA-L6-A4EQ | | TCGA-L6-A4EU | | TCGA-BJ-A0YZ | | TCGA-BJ-A0Z0 | | TCGA-BJ-A0Z2 | | TCGA-BJ-A0Z3 | | TCGA-BJ-A0Z9 | | TCGA-BJ-A0ZA | | TCGA-BJ-A0ZC | | TCGA-BJ-A0ZE | | TCGA-BJ-A0ZG | | TCGA-BJ-A2NA | | TCGA-BJ-A3PR | | TCGA-BJ-A3PT | | TCGA-BJ-A4O9 | | TCGA-BJ-A18Y | | TCGA-BJ-A28R | | TCGA-BJ-A28V | | TCGA-BJ-A28W | | TCGA-BJ-A45C | | TCGA-BJ-A45D | | TCGA-BJ-A45E | | TCGA-BJ-A45F | | TCGA-BJ-A45H | | TCGA-BJ-A45I | | TCGA-BJ-A45K | | TCGA-BJ-A190 | | TCGA-BJ-A191 | | TCGA-BJ-A291 | | TCGA-CE-A3ME | | TCGA-CE-A481 | | TCGA-DJ-A1QE | | TCGA-DJ-A1QF | | TCGA-DJ-A1QG | | TCGA-DJ-A1QI | | TCGA-DJ-A1QL | | TCGA-DJ-A1QM | | TCGA-DJ-A1QN | | TCGA-DJ-A1QO | | TCGA-DJ-A1QQ | | | TCGA-DJ-A2PN | | --- | | TCGA-DJ-A2PO | | TCGA-DJ-A2PP | | TCGA-DJ-A2PT | | TCGA-DJ-A2PU | | TCGA-DJ-A2PV | | TCGA-DJ-A2PX | | TCGA-DJ-A2PZ | | TCGA-DJ-A2Q0 | | TCGA-DJ-A2Q2 | | TCGA-DJ-A2QA | | TCGA-DJ-A2QC | | TCGA-DJ-A3UK | | TCGA-DJ-A3UM | | TCGA-DJ-A3UN | | TCGA-DJ-A3UP | | TCGA-DJ-A3US | | TCGA-DJ-A3UT | | TCGA-DJ-A3UU | | TCGA-DJ-A3UW | | TCGA-DJ-A3UX | | TCGA-DJ-A3UY | | TCGA-DJ-A3UZ | | TCGA-DJ-A3V3 | | TCGA-DJ-A3V5 | | TCGA-DJ-A3V7 | | TCGA-DJ-A3VE | | TCGA-DJ-A3VG | | TCGA-DJ-A3VL | | TCGA-DJ-A3VM | | TCGA-DJ-A4UL | | TCGA-DJ-A4UT | | TCGA-DJ-A4V0 | | TCGA-DJ-A4V2 | | TCGA-DJ-A4V4 | | TCGA-DJ-A13M | | TCGA-DJ-A13O | | TCGA-DJ-A13P | | TCGA-DJ-A13R | | TCGA-DJ-A13S | | TCGA-DJ-A13T | | TCGA-DJ-A13U | | TCGA-DJ-A13W | | TCGA-DJ-A13X | | TCGA-E3-A3DZ | | TCGA-E3-A3E0 | | TCGA-E3-A3E1 | | TCGA-E3-A3E3 | | TCGA-E8-A2EA | | TCGA-E8-A3X7 | | TCGA-E8-A44K | | TCGA-E8-A44M | | TCGA-E8-A242 | | TCGA-E8-A413 | | TCGA-E8-A414 | | TCGA-E8-A416 | | TCGA-E8-A418 | | TCGA-E8-A432 | | TCGA-E8-A433 | | TCGA-E8-A434 | | TCGA-E8-A438 | | TCGA-EL-A3CN | | TCGA-EL-A3CS | | TCGA-EL-A3CX | | TCGA-EL-A3D1 | | TCGA-EL-A3GO | | TCGA-EL-A3GQ | | TCGA-EL-A3GV | | TCGA-EL-A3GW | | TCGA-EL-A3H1 | | TCGA-EL-A3H2 | | TCGA-EL-A3MW | | TCGA-EL-A3T1 | | TCGA-EL-A3T3 | | TCGA-EL-A3T6 | | TCGA-EL-A3T7 | | TCGA-EL-A3T8 | | TCGA-EL-A3TA | | TCGA-EL-A3ZG | | TCGA-EL-A3ZQ | | TCGA-EL-A3ZR | | TCGA-EL-A3ZT | | TCGA-EL-A4JV | | TCGA-EL-A4JX | | TCGA-EL-A4K2 | | TCGA-EL-A4K9 | | TCGA-EL-A4KG | | TCGA-EL-A4KH | | TCGA-EL-A4KI | | TCGA-EM-A1CS | | TCGA-EM-A1CV | | TCGA-EM-A1CW | | TCGA-EM-A1YC | | TCGA-EM-A1YD | | TCGA-EM-A1YE | | | TCGA-EM-A2CN | | --- | | TCGA-EM-A2CP | | TCGA-EM-A2CR | | TCGA-EM-A2CT | | TCGA-EM-A2OV | | TCGA-EM-A2OY | | TCGA-EM-A2OZ | | TCGA-EM-A2P2 | | TCGA-EM-A3AK | | TCGA-EM-A3AL | | TCGA-EM-A3AQ | | TCGA-EM-A3FN | | TCGA-EM-A3FO | | TCGA-EM-A3FP | | TCGA-EM-A3O8 | | TCGA-EM-A3O9 | | TCGA-EM-A3OA | | TCGA-EM-A3OB | | TCGA-EM-A3ST | | TCGA-EM-A3SZ | | TCGA-EM-A4FO | | TCGA-EM-A4FV | | TCGA-EM-A4G1 | | TCGA-EM-A22I | | TCGA-EM-A22J | | TCGA-EM-A22L | | TCGA-EM-A22M | | TCGA-EM-A22N | | TCGA-EM-A22Q | | TCGA-ET-A2MZ | | TCGA-ET-A2N4 | | TCGA-ET-A3BQ | | TCGA-ET-A3DQ | | TCGA-ET-A3DS | | TCGA-ET-A3DV | | TCGA-ET-A4KN | | TCGA-ET-A25G | | TCGA-ET-A25I | | TCGA-ET-A25P | | TCGA-ET-A39L | | TCGA-ET-A39O | | TCGA-ET-A39P | | TCGA-ET-A39R | | TCGA-ET-A39S | | TCGA-ET-A39T | | TCGA-ET-A40P | | TCGA-ET-A40S | | TCGA-FE-A3PA | | TCGA-FE-A3PD | | TCGA-FE-A23A | | TCGA-FE-A238 | | TCGA-FE-A239 | | TCGA-FK-A3SD | | TCGA-FY-A2QD | | TCGA-FY-A3I4 | | TCGA-FY-A3I5 | | TCGA-FY-A3NM | | TCGA-FY-A3NP | | TCGA-FY-A3R9 | | TCGA-FY-A3TY | | TCGA-FY-A3W9 | | TCGA-FY-A40K | | TCGA-FY-A40M | | TCGA-FY-A40N | | TCGA-H2-A3RH | | TCGA-H2-A3RI | | TCGA-H2-A26U | | TCGA-H2-A422 | | TCGA-IM-A3ED | | TCGA-IM-A3U3 | | TCGA-IM-A41Z | | TCGA-J8-A3O0 | | TCGA-KS-A4I1 | | TCGA-KS-A4I7 | | TCGA-KS-A4I9 | | TCGA-KS-A4ID | | TCGA-KS-A41I | | TCGA-KS-A41L | | TCGA-L6-A4EP | | TCGA-MK-A4N7 | | TCGA-BJ-A45G | | TCGA-CE-A3MD | | TCGA-CE-A13K | | TCGA-CE-A27D | | TCGA-CE-A482 | | TCGA-CE-A483 | | TCGA-CE-A484 | | TCGA-CE-A485 | | TCGA-DE-A4M8 | | TCGA-E8-A419 | | TCGA-EL-A3GS | | TCGA-EL-A3GU | | TCGA-EL-A3GX | | TCGA-EL-A3GY | | TCGA-EL-A3H4 | | | TCGA-EL-A3H5 | | --- | | TCGA-EL-A3H7 | | TCGA-EL-A3H8 | | TCGA-EL-A3MZ | | TCGA-EL-A3N2 | | TCGA-EL-A3T0 | | TCGA-EL-A3T2 | | TCGA-EL-A3T9 | | TCGA-EL-A3ZH | | TCGA-EL-A3ZK | | TCGA-EL-A3ZL | | TCGA-EL-A3ZP | | TCGA-EL-A3ZS | | TCGA-EL-A4K1 | | TCGA-EL-A4K4 | | TCGA-EL-A4K6 | | TCGA-EL-A4K7 | | TCGA-EL-A4KD | | TCGA-EM-A4FF | | TCGA-EM-A4FQ | | TCGA-EM-A4FR | | TCGA-ET-A3DW | | TCGA-ET-A25M | | TCGA-FE-A3PC | | TCGA-FE-A22Z | | TCGA-FE-A234 | | TCGA-FE-A235 | | TCGA-FE-A236 | | TCGA-FE-A237 | | TCGA-FY-A3ON | | TCGA-J8-A3YE | | TCGA-J8-A3YF | | TCGA-J8-A4HW | | TCGA-KS-A4I3 | | TCGA-KS-A4IB | | TCGA-KS-A41F | | TCGA-KS-A41J | | TCGA-MK-A4N9 | | TCGA-BJ-A2N7 | | TCGA-BJ-A2N8 | | TCGA-BJ-A2N9 | | TCGA-BJ-A2NA | | TCGA-BJ-A3PR | | TCGA-BJ-A3PU | | TCGA-BJ-A28R | | TCGA-BJ-A28W | | TCGA-BJ-A28X | | TCGA-BJ-A290 | | TCGA-DO-A1JZ | | TCGA-E8-A2JQ | | TCGA-EL-A3GZ | | TCGA-EL-A3H1 | | TCGA-EL-A3H2 | | TCGA-EL-A3H7 | | TCGA-EL-A3MW | | TCGA-EL-A3MX | | TCGA-EL-A3MY | | TCGA-EL-A3N2 | | TCGA-EL-A3N3 | | TCGA-EL-A3T0 | | TCGA-EL-A3T1 | | TCGA-EL-A3T2 | | TCGA-EL-A3T3 | | TCGA-EL-A3T6 | | TCGA-EL-A3T7 | | TCGA-EL-A3T8 | | TCGA-EL-A3TA | | TCGA-EL-A3TB | | TCGA-EL-A3ZG | | TCGA-EL-A3ZH | | TCGA-EL-A3ZK | | TCGA-EL-A3ZL | | TCGA-EL-A3ZM | | TCGA-EL-A3ZO | | TCGA-EL-A3ZP | | TCGA-EL-A3ZQ | | TCGA-EL-A3ZR | | TCGA-EL-A3ZS | | TCGA-EL-A3ZT | | TCGA-EM-A1CS | | TCGA-EM-A1CT | | TCGA-EM-A1CU | | TCGA-EM-A1CV | | TCGA-EM-A1CW | | TCGA-EM-A1YC | | TCGA-EM-A3ST | | TCGA-ET-A2MX | | TCGA-ET-A2N5 | | TCGA-ET-A3DP | | TCGA-ET-A3DW | | TCGA-FY-A3TY | | TCGA-GE-A2C6 | | TCGA-H2-A2K9 | | TCGA-H2-A3RI | | TCGA-KS-A41I | | TCGA-KS-A41J | | TCGA-KS-A41L | |

Samples excluded from analyses were TCGA-DJ-A2Q8 and TCGA-ET-A2N1 due to no RNAseq data available while TCGA-DJ-A13V has no miRNAseq data. There were ten patients with matched normal adjacent tissue expression data: TCGA-BJ-A28X, TCGA-BJ-A290, TCGA-BJ-A3PU, TCGA-E8-A2JQ, TCGA-EL-A3TB, TCGA-EM-A1CT, TCGA-EM-A1CU, TCGA-ET-A2MX, TCGA-GE-A2C6 and TCGA-H2-A2K9.
